# Supplementary material
Source: MDPI journal article supplement (https://www.mdpi.com/2039-4403/11/4/73)
Supplement: s1 [file s1]

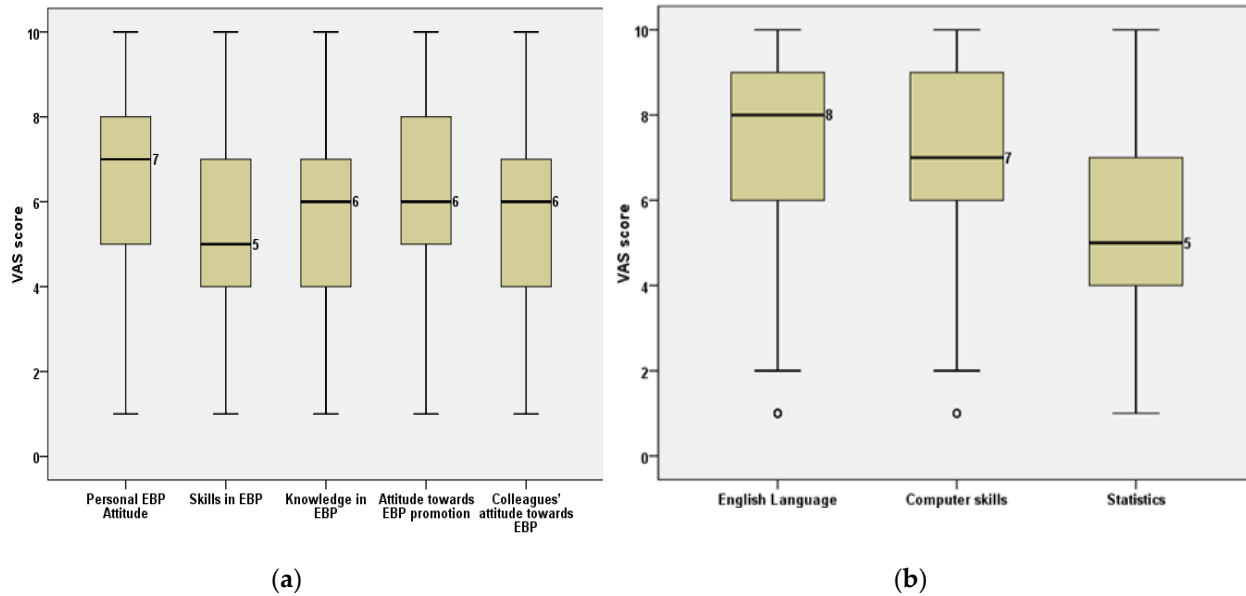

**Figure S1. (a)** Box and Whisker plots for skills, knowledge, attitude VAS scales; **(b)** Box and Whisker plots of VAS scales scores for personal skills on language, computer skills and statistics

**Table S1.** Pearson's and Spearman's rho coefficients for EBP-COQ\_GR questionnaire\*

| Factor                    |   | Attitude toward EBP | Knowledge - Skills in EBP | EBP Perceptions |
|---------------------------|---|---------------------|---------------------------|-----------------|
| Attitude toward EBP       | r | 1.000               | 0.309                     | 0.209           |
|                           | p | -                   | <0.001                    | <0.001          |
| Knowledge - Skills in EBP | r | 0.261               | 1.000                     | -0.015          |
|                           | p | <0.001              | -                         | 0.786           |
| EBP Perceptions           | r | 0.192               | -0.058                    | 1.000           |
|                           | p | <0.001              | 0.304                     | -               |

\* Up diagonal Pearson's rho coefficients, Down diagonal Spearman's rho coefficients

**Table S2.** Correlation of EBP-COQ\_GR subscales vs knowledge in special subjects. Discriminant ability

| Knowledge in     |    | EBP Attitude | Knowledge -Skills in EBP | EBP Perceptions |
|------------------|----|--------------|--------------------------|-----------------|
| English language | rs | 0.101        | 0.019                    | 0.225           |
| Computer Skills  | p  | 0.071        | 0.742                    | <0.001          |
|                  | rs | 0.108        | 0.135                    | 0.160           |
|                  | p  | 0.054        | 0.016                    | 0.004           |

|                   |    |       |        |       |
|-------------------|----|-------|--------|-------|
| Statistics Skills | rs | 0.048 | 0.262  | 0.029 |
|                   | p  | 0.397 | <0.001 | 0.611 |

**Table S3.** Discriminant ability EBP-COQ\_GR vs sex, education in EBP

|                                     | Attitude toward<br>EBP |     | Knowledge-Skills<br>in EBP |     | EBP<br>Perceptions |     |
|-------------------------------------|------------------------|-----|----------------------------|-----|--------------------|-----|
| Sex                                 | Mean                   | SD  | Mean                       | SD  | Mean               | SD  |
| Man                                 | 34.3                   | 6.2 | 28.2                       | 4,3 | 22,9               | 6,2 |
| Woman                               | 35.3                   | 5.5 | 26.1                       | 5,3 | 25,7               | 5,3 |
| P                                   | 0.164                  |     | 0.003                      |     | <0.001             |     |
| Education in<br>EBP                 |                        |     |                            |     |                    |     |
| Without                             | 34.3                   | 5.9 | 25.9                       | 5,2 | 24,0               | 5,3 |
| With                                | 36.0                   | 5.3 | 27.5                       | 5,0 | 26,3               | 5,8 |
| P                                   | 0.011                  |     | 0.016                      |     | <0.001             |     |
| Education in<br>Research<br>Methods |                        |     |                            |     |                    |     |
| Without                             | 34.6                   | 5.7 | 26.0                       | 5,3 | 24,6               | 5,6 |
| With                                | 35.9                   | 5.6 | 27.6                       | 4,7 | 25,9               | 5,6 |
| P                                   | 0.024                  |     | 0.009                      |     | 0.025              |     |
